# Supplementary material for: What are the most efficacious treatment regimens for isoniazid-resistant tuberculosis? A systematic review and network meta-analysis
Source: PubMed Central journal article supplement (PMC5036252; doi:10.1136/thoraxjnl-2015-208262), 2016-06-13
Supplement: thoraxjnl-2015-208262supp_file1.pdf [file thoraxjnl-2015-208262supp_file1.pdf]

## SUPPLEMENTARY FILE 1: Search strategy

### Ovid MEDLINE(R) In-Process & Other Non-Indexed Citations and Ovid MEDLINE(R)

|     |                                                                                                                                                                                                                                                      |              |
|-----|------------------------------------------------------------------------------------------------------------------------------------------------------------------------------------------------------------------------------------------------------|--------------|
| #1  | exp Tuberculosis/                                                                                                                                                                                                                                    | 159,835      |
| #2  | (TB or tuberculo*).mp. [mp=title, abstract, original title, name of substance word, subject heading word, keyword heading word, protocol supplementary concept word, rare disease supplementary concept word, unique identifier]                     | 218,140      |
| #3  | 1 OR 2                                                                                                                                                                                                                                               | 219,653      |
| #4  | exp Drug Therapy/                                                                                                                                                                                                                                    | 1,059,465    |
| #5  | (treatment or therapy or therapeutic*).mp. [mp=title, abstract, original title, name of substance word, subject heading word, keyword heading word, protocol supplementary concept word, rare disease supplementary concept word, unique identifier] | 4,638,973    |
| #6  | 4 OR 5                                                                                                                                                                                                                                               | 5,056,475    |
| #7  | exp controlled clinical trial/                                                                                                                                                                                                                       | 88,431       |
| #8  | exp Randomized Controlled Trial/                                                                                                                                                                                                                     | 381,471      |
| #9  | randomi#ed.mp.                                                                                                                                                                                                                                       | 600,633      |
| #10 | trial.mp.                                                                                                                                                                                                                                            | 875,289      |
| #11 | 7 OR 8 OR 9 OR 10                                                                                                                                                                                                                                    | 1,026,177    |
| #12 | <b>3 AND 6 AND 11</b>                                                                                                                                                                                                                                | <b>3,176</b> |

### Web of Science

|    |                                                                                                                           |              |
|----|---------------------------------------------------------------------------------------------------------------------------|--------------|
| #1 | (Tuberculosis[MeSH Terms]) OR TB OR tuberculo*                                                                            | ~619,973     |
| #2 | (Drug Therapy[MeSH Terms]) OR treatment OR therapy OR therapeutic*                                                        | ~21,168,564  |
| #3 | (Controlled Clinical Trial[MeSH Terms]) OR (Randomized Controlled Trial[MeSH Terms]) OR randomized OR randomised OR trial | ~3,704,538   |
| #4 | <b>1 AND 2 AND 3</b>                                                                                                      | <b>6,828</b> |

### Embase Classic+Embase

|     |                                                                                                                                                                                                      |              |
|-----|------------------------------------------------------------------------------------------------------------------------------------------------------------------------------------------------------|--------------|
| #1  | exp tuberculosis/                                                                                                                                                                                    | 234,249      |
| #2  | (TB or tuberculo*).mp. [mp=title, abstract, subject headings, heading word, drug trade name, original title, device manufacturer, drug manufacturer, device trade name, keyword]                     | 319,051      |
| #3  | 1 OR 2                                                                                                                                                                                               | 321,086      |
| #4  | exp drug therapy/                                                                                                                                                                                    | 1,946,560    |
| #5  | (treatment or therapy or therapeutic*).mp. [mp=title, abstract, subject headings, heading word, drug trade name, original title, device manufacturer, drug manufacturer, device trade name, keyword] | 7,309,829    |
| #6  | 4 OR 5                                                                                                                                                                                               | 7,714,699    |
| #7  | exp controlled clinical trial/                                                                                                                                                                       | 494,417      |
| #8  | randomi#ed.mp.                                                                                                                                                                                       | 688,909      |
| #9  | trial.mp.                                                                                                                                                                                            | 1,338,760    |
| #10 | 7 OR 8 OR 9                                                                                                                                                                                          | 1,481,721    |
| #11 | <b>3 AND 6 AND 10</b>                                                                                                                                                                                | <b>8,519</b> |
