# Supplementary material for: What are the most efficacious treatment regimens for isoniazid-resistant tuberculosis? A systematic review and network meta-analysis
Source: PubMed Central journal article supplement (PMC5036252; doi:10.1136/thoraxjnl-2015-208262), 2016-06-13
Supplement: thoraxjnl-2015-208262supp_file10.pdf [file thoraxjnl-2015-208262supp_file10.pdf]

**SUPPLEMENTARY FILE 10: SENSITIVITY ANALYSIS REGROUPING ONE ARM OF GIRLING *ET AL.***

**Odds ratios and relative ranks from fixed- and random-effects network meta-analyses across all isoniazid resistance profiles- one arm of Girling *et al.* 1991 recoded to regimen RIF ED<3 D=6m**

Sensitivity analysis regrouping one treatment arm of Girling *et al.* 1991 [1] from regimen RIF ED≥3 Pr6 D=6m to RIF ED<3 D=6m to reflect uncertainty during categorisation. CrI- credible interval, OR- odds ratio

| Treatment         | OR (95% CrI)      |                   | Rank (95% CrI) |                |
|-------------------|-------------------|-------------------|----------------|----------------|
|                   | Fixed-effects     | Random-effects    | Fixed-effects  | Random-effects |
| ED<3 D<6m         | 3.66 (1.12-12.35) | 4.74 (0.53-59.53) | 11 (8-11)      | 11 (4-11)      |
| ED<3 D≥6m         | 2.69 (1.28-5.85)  | 2.69 (0.68-10.85) | 10 (8-11)      | 9 (5-11)       |
| ED≥3 D≥6m         | 0.95 (0.37-2.41)  | 1.01 (0.16-6.73)  | 6 (3-9)        | 6 (2-10)       |
| RIF ED<3 D<6m     | 1.07 (0.57-2.05)  | 1.45 (0.50-5.95)  | 6 (4-9)        | 7 (4-10)       |
| RIF ED<3 D=6m     | 0.56 (0.26-1.20)  | 0.62 (0.18-2.19)  | 3 (2-6)        | 4 (1-8)        |
| RIF ED<3 D>6m     | 0.20 (0.03-1.21)  | 0.22 (0.01-3.87)  | 1 (1-7)        | 1 (1-10)       |
| RIF ED<3 Pr6 D=6m | baseline          | baseline          | 6 (3-9)        | 6 (2-9)        |
| RIF ED<3 Pr6 D>6m | 1.04 (0.40-2.67)  | 0.88 (0.12-5.53)  | 6 (3-10)       | 5 (1-10)       |
| RIF ED≥3 D<6m     | 1.68 (0.59-4.76)  | 1.99 (0.38-12.28) | 9 (4-10)       | 8 (3-11)       |
| RIF ED≥3 Pr6 D=6m | 0.83 (0.02-11.10) | 0.97 (0.01-35.60) | 5 (1-11)       | 5 (1-11)       |
| RIF ED≥3 Pr6 D>6m | 0.33 (0.12-0.84)  | 0.48 (0.08-4.67)  | 2 (1-4)        | 3 (1-9)        |

**Odds ratios and relative ranks from fixed- and random-effects network meta-analyses across all isoniazid resistance profiles- one arm of Girling *et al.* 1991 recoded to regimen RIF ED<3 Pr6 D=6m**

Sensitivity analysis regrouping one treatment arm of Girling *et al.* 1991 [1] from regimen RIF ED≥3 Pr6 D=6m to RIF ED<3 Pr6 D=6m (and thereby losing the study from the network, due to both treatment arms being grouped the same) to reflect uncertainty during categorisation. CrI- credible interval, OR- odds ratio

| Treatment         | OR (95% CrI)      |                   | Rank (95% CrI) |                |
|-------------------|-------------------|-------------------|----------------|----------------|
|                   | Fixed-effects     | Random-effects    | Fixed-effects  | Random-effects |
| ED<3 D<6m         | 3.44 (1.04-11.86) | 4.47 (0.42-67.25) | 11 (8-11)      | 11 (4-11)      |
| ED<3 D≥6m         | 2.53 (1.18-5.59)  | 2.50 (0.56-11.64) | 10 (8-11)      | 9 (5-11)       |
| ED≥3 D≥6m         | 0.91 (0.35-2.33)  | 0.95 (0.13-7.25)  | 6 (3-9)        | 6 (2-10)       |
| RIF ED<3 D<6m     | 0.99 (0.51-1.96)  | 1.35 (0.42-6.57)  | 6 (4-9)        | 7 (4-10)       |
| RIF ED<3 D=6m     | 0.48 (0.20-1.14)  | 0.53 (0.12-2.39)  | 3 (2-6)        | 3 (1-8)        |
| RIF ED<3 D>6m     | 0.17 (0.02-1.08)  | 0.19 (0.01-4.19)  | 1 (1-6)        | 1 (1-10)       |
| RIF ED<3 Pr6 D=6m | baseline          | baseline          | 6 (3-9)        | 6 (2-10)       |
| RIF ED<3 Pr6 D>6m | 1.01 (0.38-2.62)  | 0.84 (0.11-6.04)  | 6 (3-10)       | 5 (1-11)       |
| RIF ED≥3 D<6m     | 1.58 (0.54-4.53)  | 1.88 (0.32-13.36) | 9 (4-10)       | 8 (3-11)       |
| RIF ED≥3 Pr6 D=6m | 0.77 (0.02-10.43) | 0.91 (0.01-41.50) | 5 (1-11)       | 5 (1-11)       |
| RIF ED≥3 Pr6 D>6m | 0.31 (0.12-0.81)  | 0.46 (0.06-5.26)  | 2 (1-4)        | 3 (1-10)       |

**References**

- 1 Girling DJ, Chan SL. Controlled trial of 2, 4, and 6 months of pyrazinamide in 6-month, three-times-weekly regimens for smear-positive pulmonary tuberculosis, including an assessment of a combined preparation of isoniazid, rifampin, and pyrazinamide: Results at 30 months. *Am Rev Respir Dis* 1991;143:700-6.
