# Supplementary material for: What are the most efficacious treatment regimens for isoniazid-resistant tuberculosis? A systematic review and network meta-analysis
Source: PubMed Central journal article supplement (PMC5036252; doi:10.1136/thoraxjnl-2015-208262), 2016-06-13
Supplement: thoraxjnl-2015-208262supp_file11.pdf [file thoraxjnl-2015-208262supp_file11.pdf]

## SUPPLEMENTARY FILE 11: SENSITIVITY ANALYSIS- RIFAMPICIN DOSE

### Treatment regimen categorisation

Regimen categorisation flow chart for sensitivity analysis, with additional classification by dose of RIF (10mg/kg threshold). Categories present in network presented in bold. \*Levamisole and diphenyl thiourea compound SU 1906 not counted as effective protection. INH- isoniazid, RIF- rifampicin.

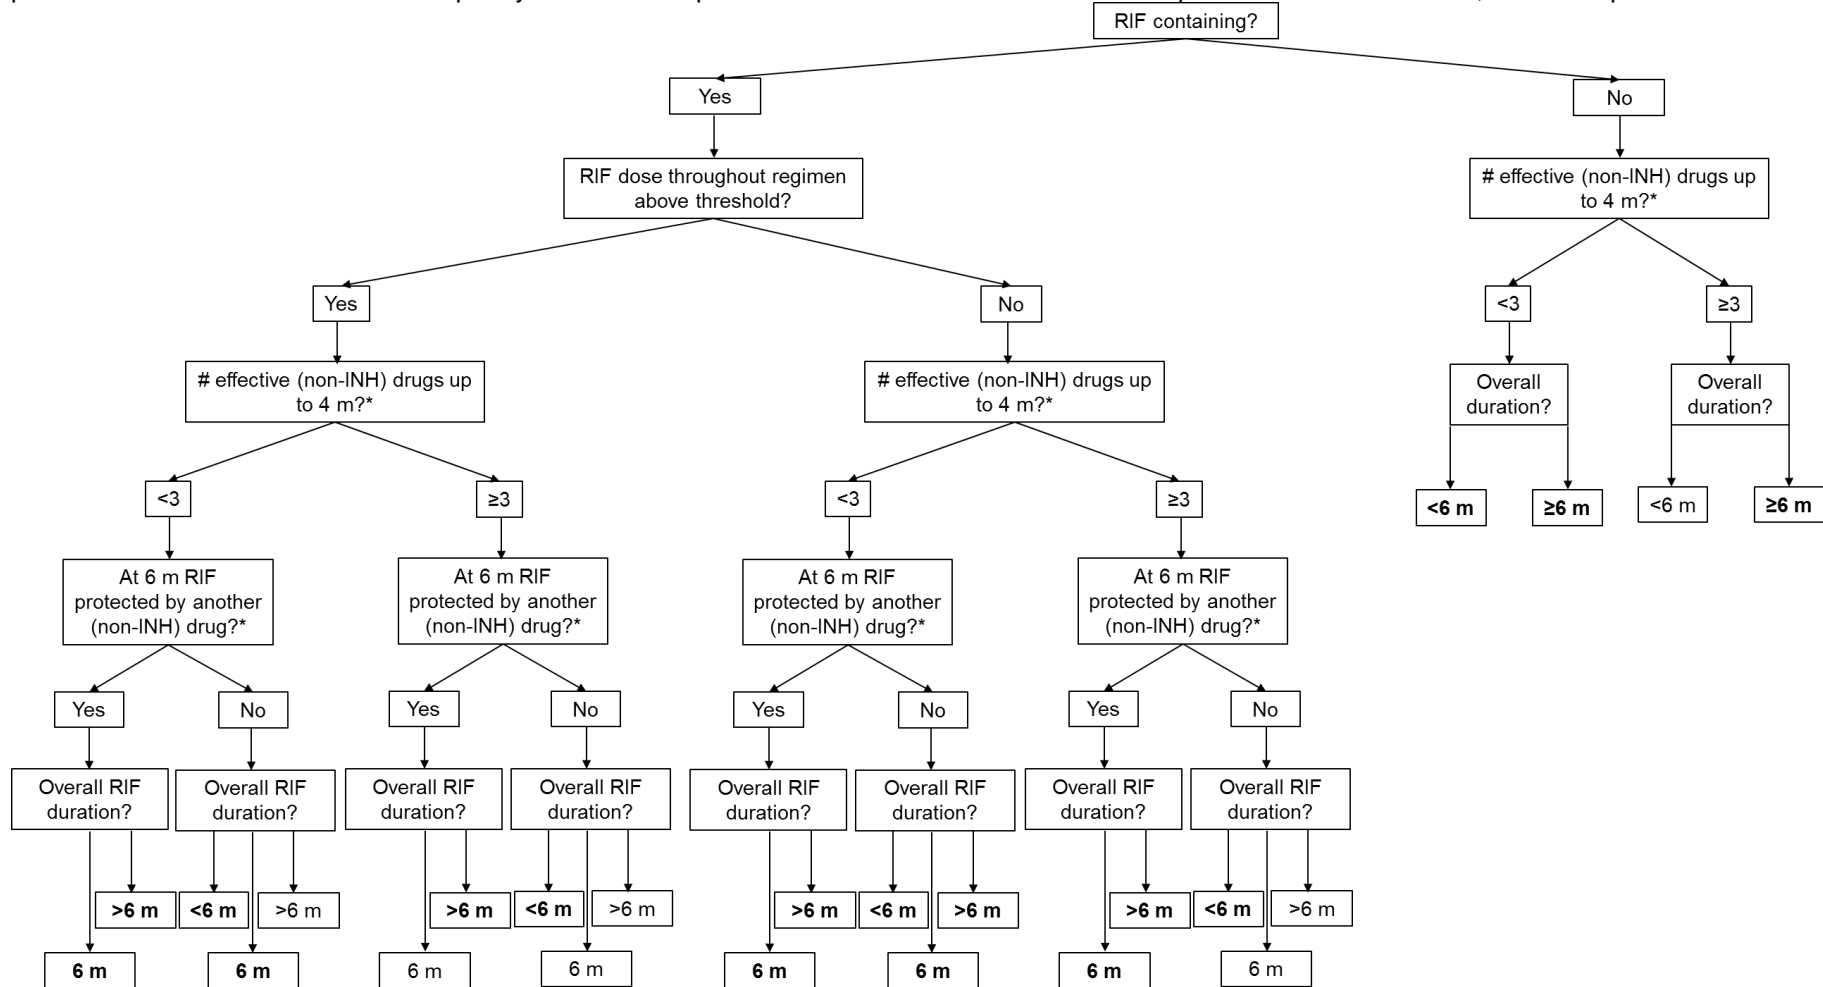

### Regimen category codes

Encoded regimen categories present in the network where rifampicin dose was taken into account (10mg/kg threshold). 4m- 4 months, 6m- 6 months, D</=>6m- overall RIF duration or duration of the entire regimen if RIF not present, ED- effective drugs, N/A- not applicable, Pr6- protected at 6 months, RIF- rifampicin, RIF<10- RIF dose below threshold

| RIF containing? | RIF dose above threshold throughout study (<10)? | # of effective drugs (ED) up to 4m? | At 6m RIF protected (Pr6) by another drug? | Overall (RIF) duration (D) | Code                 |
|-----------------|--------------------------------------------------|-------------------------------------|--------------------------------------------|----------------------------|----------------------|
| No              | N/A                                              | <3                                  | N/A                                        | <6m                        | ED<3 D<6m            |
| No              | N/A                                              | <3                                  | N/A                                        | ≥6m                        | ED<3 D≥6m            |
| No              | N/A                                              | ≥3                                  | N/A                                        | ≥6m                        | ED≥3 D≥6m            |
| Yes             | No                                               | <3                                  | No                                         | <6m                        | RIF<10 ED<3 D<6m     |
| Yes             | No                                               | <3                                  | No                                         | 6m                         | RIF<10 ED<3 D=6m     |
| Yes             | No                                               | <3                                  | No                                         | >6m                        | RIF<10 ED<3 D>6m     |
| Yes             | No                                               | <3                                  | Yes                                        | 6m                         | RIF<10 ED<3 Pr6 D=6m |
| Yes             | No                                               | <3                                  | Yes                                        | >6m                        | RIF<10 ED<3 Pr6 D>6m |
| Yes             | No                                               | ≥3                                  | No                                         | <6m                        | RIF<10 ED≥3 D<6m     |
| Yes             | No                                               | ≥3                                  | Yes                                        | 6m                         | RIF<10 ED≥3 Pr6 D=6m |
| Yes             | No                                               | ≥3                                  | Yes                                        | >6m                        | RIF<10 ED≥3 Pr6 D>6m |
| Yes             | Yes                                              | <3                                  | No                                         | <6m                        | RIF ED<3 D<6m        |
| Yes             | Yes                                              | <3                                  | No                                         | 6m                         | RIF ED<3 D=6m        |
| Yes             | Yes                                              | <3                                  | Yes                                        | 6m                         | RIF ED<3 Pr6 D=6m    |
| Yes             | Yes                                              | <3                                  | Yes                                        | >6m                        | RIF ED<3 Pr6 D>6m    |
| Yes             | Yes                                              | ≥3                                  | No                                         | <6m                        | RIF ED≥3 D<6m        |
| Yes             | Yes                                              | ≥3                                  | Yes                                        | >6m                        | RIF ED≥3 Pr6 D>6m    |

## Data network

Data network utilising the regimen categorisation presented above. Thickness of lines and numbers indicate the number of studies making this comparison. \*One study arm classifiable as RIF<10 ED≥3 Pr6 D=6m, RIF<10 ED<3 Pr6 D=6m or RIF<10 ED<3 D=6m compared to RIF<10 ED<3 D=6m; listed as RIF<10 ED≥3 Pr6 D=6m as per this analysis.

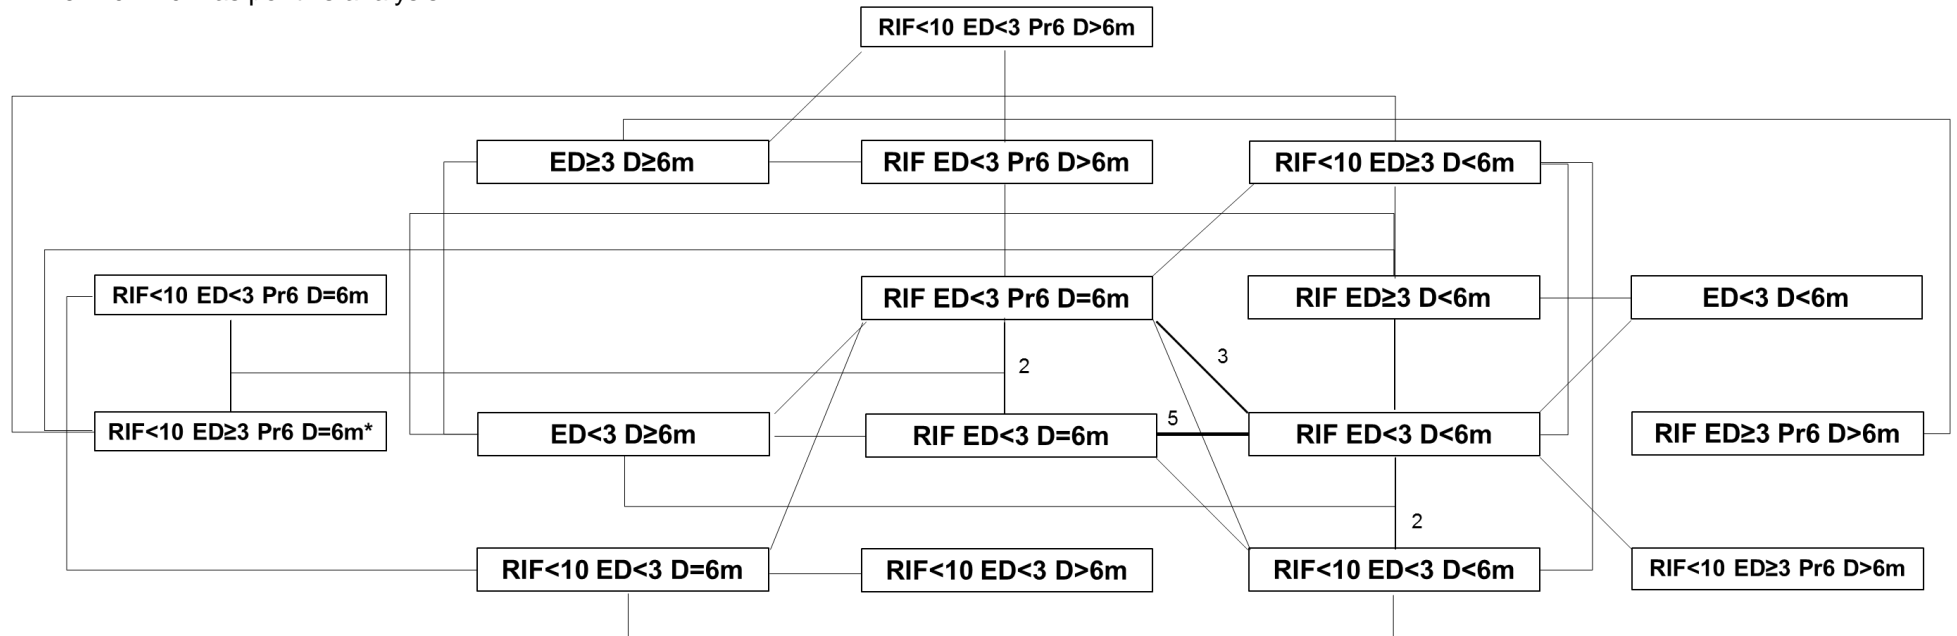

**Odds ratios and relative ranks from fixed- and random-effects network meta-analyses across all isoniazid resistance profiles**

Sensitivity analysis further dividing the regimen groups into additional categorisations on the basis of having a low versus an acceptable rifampicin dose. CrI- credible interval, OR- odds ratio

| Treatment            | OR (95% CrI)      |                   | Rank (95% CrI) |                |
|----------------------|-------------------|-------------------|----------------|----------------|
|                      | Fixed-effects     | Random-effects    | Fixed-effects  | Random-effects |
| ED<3 D<6m            | 4.72 (1.33-18.48) | 5.39 (0.53-69.49) | 17 (13-17)     | 17 (7-17)      |
| ED<3 D≥6m            | 2.67 (1.23-6.06)  | 2.48 (0.59-10.27) | 15 (12-17)     | 14 (7-17)      |
| ED≥3 D≥6m            | 0.68 (0.19-2.20)  | 0.67 (0.08-5.55)  | 7 (2-14)       | 7 (2-15)       |
| RIF<10 ED<3 D<6m     | 1.54 (0.54-4.34)  | 1.89 (0.39-12.97) | 13 (6-16)      | 13 (5-17)      |
| RIF<10 ED<3 D=6m     | 0.44 (0.01-5.47)  | 0.44 (0.01-8.83)  | 5 (1-17)       | 5 (1-17)       |
| RIF<10 ED<3 D>6m     | 0.15 (0.00-3.18)  | 0.15 (0.00-7.77)  | 2 (1-15)       | 2 (1-16)       |
| RIF<10 ED<3 Pr6 D=6m | 0.42 (0.03-3.84)  | 0.41 (0.02-6.80)  | 5 (1-16)       | 5 (1-16)       |
| RIF<10 ED<3 Pr6 D>6m | 1.01 (0.29-3.31)  | 0.97 (0.07-12.33) | 10 (4-16)      | 9 (2-17)       |
| RIF<10 ED≥3 D<6m     | 0.94 (0.20-3.66)  | 1.14 (0.15-9.79)  | 9 (2-16)       | 10 (2-17)      |
| RIF<10 ED≥3 Pr6 D=6m | 0.56 (0.04-4.88)  | 0.61 (0.03-10.32) | 6 (1-16)       | 7 (1-17)       |
| RIF<10 ED≥3 Pr6 D>6m | 0.81 (0.18-3.68)  | 0.96 (0.07-16.37) | 8 (2-16)       | 9 (1-17)       |
| RIF ED<3 D<6m        | 1.13 (0.56-2.36)  | 1.34 (0.42-5.89)  | 11 (6-14)      | 11 (6-15)      |
| RIF ED<3 D=6m        | 0.55 (0.22-1.37)  | 0.54 (0.12-2.42)  | 6 (2-11)       | 6 (2-12)       |
| RIF ED<3 Pr6 D=6m    | baseline          | baseline          | 10 (5-14)      | 9 (4-15)       |
| RIF ED<3 Pr6 D>6m    | 0.58 (0.18-1.71)  | 0.54 (0.07-3.76)  | 6 (2-13)       | 6 (1-15)       |
| RIF ED≥3 D<6m        | 2.52 (0.74-9.14)  | 2.59 (0.38-19.59) | 15 (9-17)      | 14 (6-17)      |
| RIF ED≥3 Pr6 D>6m    | 0.22 (0.06-0.75)  | 0.22 (0.01-4.05)  | 3 (1-7)        | 3 (1-14)       |
