# Supplementary material for: What are the most efficacious treatment regimens for isoniazid-resistant tuberculosis? A systematic review and network meta-analysis
Source: PubMed Central journal article supplement (PMC5036252; doi:10.1136/thoraxjnl-2015-208262), 2016-06-13
Supplement: thoraxjnl-2015-208262supp_file12.pdf [file thoraxjnl-2015-208262supp_file12.pdf]

## SUPPLEMENTARY FILE 12: ISONIAZID MONORESISTANCE ONLY

### Data network

Data network restricted to patients with isoniazid mono-resistant disease only. Thickness of lines and numbers indicate the number of studies making this comparison. \*One study arm classifiable as RIF ED $\geq$ 3 Pr6 D=6m, RIF ED $<$ 3 Pr6 D=6m or RIF ED $<$ 3 D=6m compared to RIF ED $<$ 3 D=6m; here listed as RIF ED $\geq$ 3 Pr6 D=6m as per this analysis.

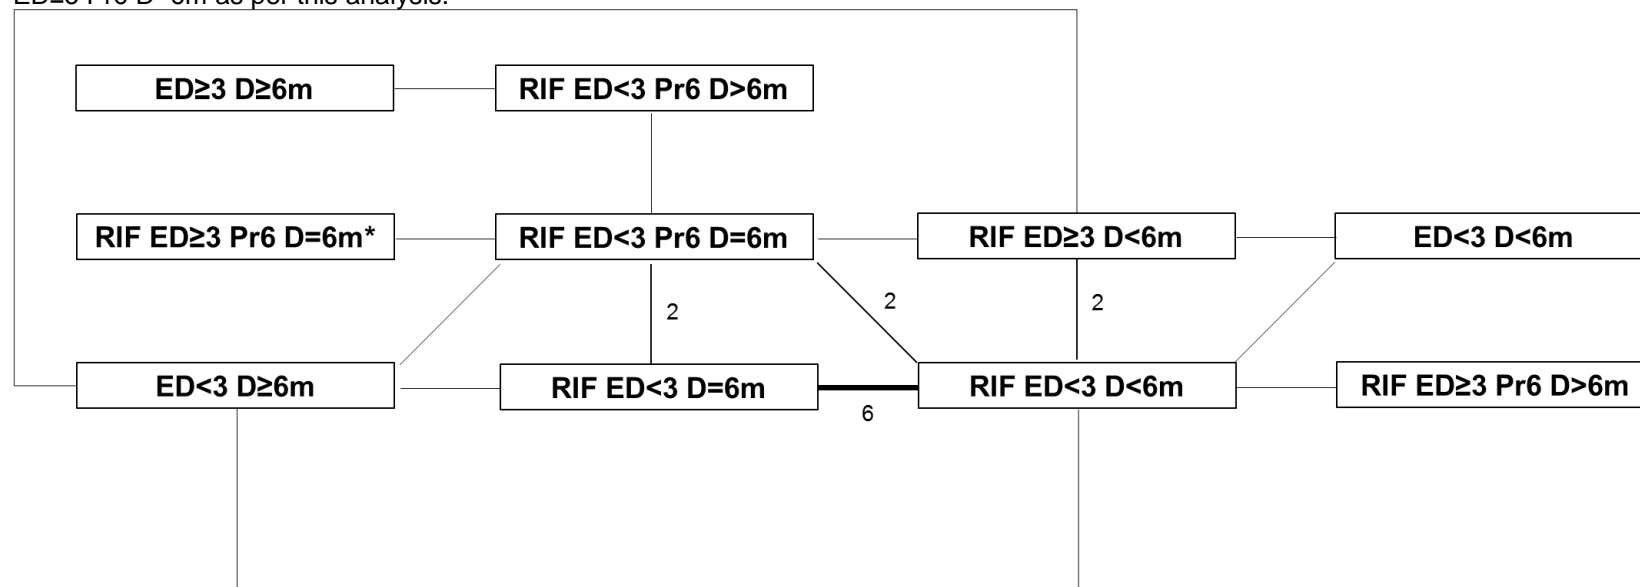

### Odds ratios and relative ranks from fixed- and random-effects network meta-analyses

Sensitivity analysis restricting to studies where isoniazid mono-resistance was described. CrI- credible interval, OR- odds ratio

| Treatment         | OR (95% CrI)        |                     | Rank (95% CrI) |                |
|-------------------|---------------------|---------------------|----------------|----------------|
|                   | Fixed-effects       | Random-effects      | Fixed-effects  | Random-effects |
| ED<3 D<6m         | 15.64 (2.18-122.30) | 18.14 (0.62-730.00) | 10 (7-10)      | 10 (4-10)      |
| ED<3 D≥6m         | 3.49 (1.14-12.65)   | 3.12 (0.28-23.50)   | 8 (4-10)       | 7 (2-10)       |
| ED≥3 D≥6m         | 0.70 (0.10-4.71)    | 0.70 (0.01-56.69)   | 2 (1-8)        | 3 (1-10)       |
| RIF ED<3 D<6m     | 2.80 (0.90-9.88)    | 3.40 (0.58-30.14)   | 7 (4-9)        | 7 (4-9)        |
| RIF ED<3 D=6m     | 0.77 (0.20-2.93)    | 0.83 (0.10-6.31)    | 3 (1-6)        | 3 (1-7)        |
| RIF ED<3 Pr6 D=6m | baseline            | baseline            | 4 (1-6)        | 4 (1-7)        |
| RIF ED<3 Pr6 D>6m | 1.03 (0.18-6.01)    | 1.02 (0.04-27.79)   | 4 (1-9)        | 4 (1-10)       |
| RIF ED≥3 D<6m     | 6.57 (1.25-38.16)   | 6.87 (0.41-115.20)  | 9 (5-10)       | 9 (3-10)       |
| RIF ED≥3 Pr6 D=6m | 0.62 (0.04-21.17)   | 0.63 (0.01-52.19)   | 2 (1-10)       | 3 (1-10)       |
| RIF ED≥3 Pr6 D>6m | 2.02 (0.32-13.62)   | 2.45 (0.07-118.00)  | 6 (1-9)        | 6 (1-10)       |
